# Supplementary material
Source: MDPI journal article supplement (https://www.mdpi.com/2072-4292/16/1/157)
Supplement: s1 [file s1 › remotesensing-2749014-supplementary.pdf]

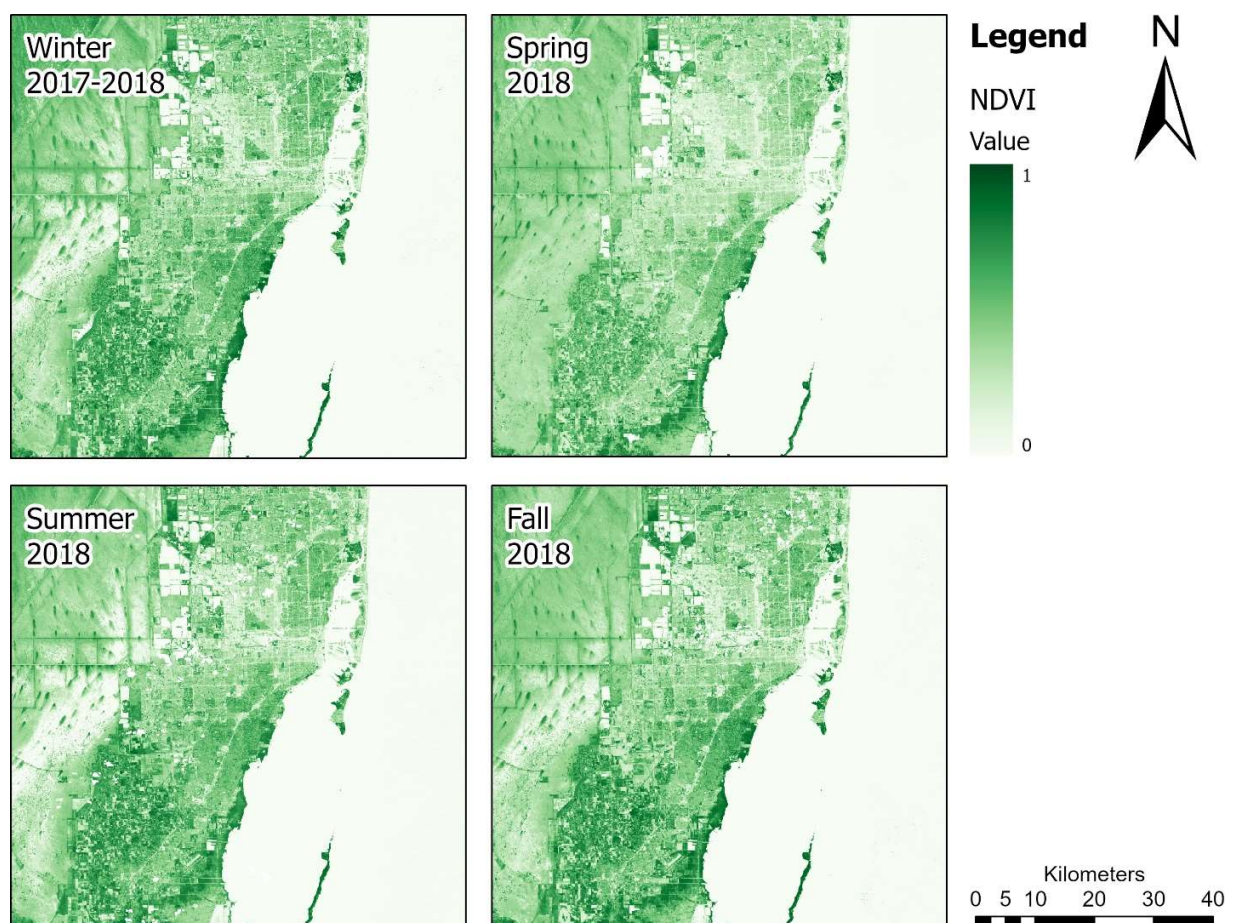

**Supplementary Figure S1.** Examples of composite NDVI images representing each season throughout the entire study area in 2018.

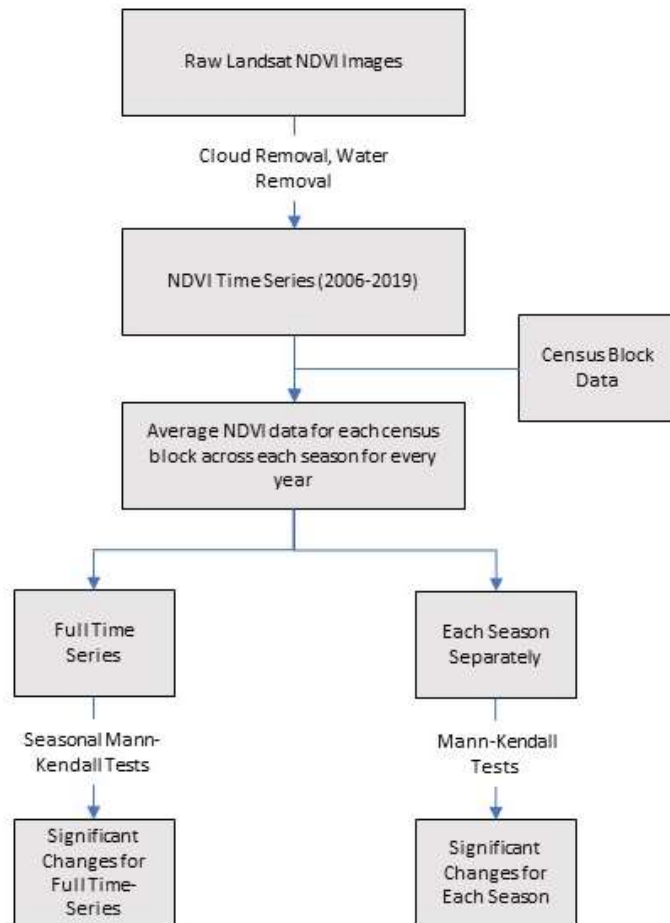

**Supplementary Figure S2.** Flow diagram of the methodology for detecting significant trends in greenness across the entire time series and individual seasons.
